# Supplementary material for: Architecture of the trypanosome RNA editing accessory complex, MRB1
Source: PubMed Central journal article supplement — Nucleic Acids Res. 2012 Mar 6;40(12):5637–50. doi: 10.1093/nar/gks211 (PMC3384329; doi:10.1093/nar/gks211), 2012-03-06
Supplement: supp_gks211_nar-02919-r-2011-File007.pdf [file supp_gks211_nar-02919-r-2011-File007.pdf]

## Architecture of the Trypanosome RNA Editing Accessory Complex, MRB1

Michelle L. Ammerman, Kurtis M. Downey, Hassan Hashimi, John C. Fisk, Danielle L. Tomasello, Drahomíra Faktorová, Lucie Hanzálková, Tony King, Julius Lukeš, and Laurie K. Read

### Supplementary Data:

**Table S1. Primers used in this study**

#### Yeast two hybrid primers

| Name     | 5' Primer                                                | 3' Primer                                                |
|----------|----------------------------------------------------------|----------------------------------------------------------|
| kPAP1    | GCGCATATGAGAAAGTTTTCAGCTTTT<br>CGGTC                     | GCGCTGCAGCTCGAGCTACTGATGAT<br>TGTCGCATTTTATCC            |
| kPAP1    | GGAGGCCAGT <b>GAATTC</b> ATGAGAAAG<br>TTTTCAGCTTTTTCGGTC | CGAGCTCGAT <b>GGATCC</b> CTACTGATGA<br>TTGTTCGCATTTTATCC |
| 7510     | AAAAGAGATC <b>GAATTC</b> ATGCGGCACA<br>CAATACC           | TGCAGGTCGACAT <b>CGAT</b> GTTATTGTC<br>ATCAAGTATATCC     |
| 0024     | AAAAGAGATC <b>GAATTC</b> ATGCGGCGTT<br>GGCACC            | TGCAGGTCGACAT <b>CGATA</b> ACCTTGTC<br>CTCGTCGTC         |
| PPR5     | AAAAGAGATC <b>GAATTC</b> ATGCTCCGCC<br>GTAGTGA           | TGCAGGTCGACAT <b>CGAT</b> ATATGCAGT<br>TCCACAAACCT       |
| 3180     | AAAAGAGATC <b>GAATTC</b> ATGCTTCGCT<br>GCACTGTT          | TGCAGGTCGACAT <b>CGAT</b> ATAGGGGCC<br>ACTCGTC           |
| PPR1     | TGTATCGCCG <b>GAATTC</b> ATGTTCCAAC<br>GCCGTTAGTGCTG     | TGCAGGTCGACAT <b>CGAT</b> CTAAACATC<br>CGCACCGGCAGC      |
| MRB0130  | AAAAGAGATC <b>GAATTC</b> ATGCGGCGG<br>TGTTCCCTT          | TGCAGGTCGACAT <b>CGAT</b> CAAACCTTAC<br>CTTCCCTACAG      |
| 3900     | AAAAGAGATC <b>GAATTC</b> ATGAATCGTA<br>CGGGTGGG          | TGCAGGTCGACAT <b>CGAT</b> CACCTTCTT<br>GATACCCAGT        |
| 5120     | AAAAGAGATC <b>GAATTC</b> ATGACATCTA<br>GCGTAACC          | TGCAGGTCGACAT <b>CGAT</b> TTTTTTTCTTC<br>CCCTTGTTCTTTCT  |
| GAP1     | TGTATCGCCG <b>GAATTC</b> ATGCTGCGC<br>GCGCGCCTG          | TGCAGGTCGACAT <b>CGAT</b> CTAGTATGC<br>CGAAACGGCAGTC     |
| GAP2     | AAAAGAGATC <b>GAATTC</b> ATGCTTCGCT<br>TATTGCGG          | TGCAGGTCGACAT <b>CGAT</b> CAACTTCGC<br>CTCACAGCC         |
| Helicase | AAAAGAGATC <b>GAATTC</b> ATGCGGGCC<br>ATACGACTAA         | TGCAGGTCGACAT <b>CGAT</b> TTACGAGTC<br>TCCACCAGCC        |
| MRB11870 | AAAAGAGATC <b>GAATTC</b> ATGCTGCGCC<br>ACACATCACG        | TGCAGGTCGACAT <b>CGAT</b> TTATTTCTGC<br>AGTTGATGCGTC     |
| MERS1    | AAAAGAGATC <b>GAATTC</b> ATGCGCAAGC<br>AATTATTTTTT       | TGCAGGTCGACAT <b>CGAT</b> TCACGATGC<br>ATCTTCCCCG        |
| MRB1820  | AAAAGAGATC <b>GAATTC</b> ATGCGAACCC<br>AAGGATCCTTCG      | TGCAGGTCGACAT <b>CGAT</b> CTAGCGGGG<br>TATTGCCCC         |
| MRB2140  | CATGGAGGCC <b>GAATTC</b> ATGTTCCGCT<br>GGTCGTGGTG        | GCAGGTCGAC <b>GGATCCT</b> CAGGTTAAG<br>GACGCAGAAACA      |
| MRB3010  | AAAAGAGATC <b>GAATTC</b> ATGCGGAGC<br>GCGTTGCG           | TGCAGGTCGACAT <b>CGAT</b> TGCTTGCGG<br>TGTAGACC          |

|                 |                                                           |                                                           |
|-----------------|-----------------------------------------------------------|-----------------------------------------------------------|
| <b>MRB5390</b>  | AAAAGAGATC <b>GAATTC</b> ATGAATGGGA<br>GGCTGTACT          | TGCAGGTCGACAT <b>CGAT</b> GCGTCTCAA<br>TAGAAGCTG          |
| <b>MRB4160</b>  | AAAAGAGATC <b>GAATTC</b> ATGTACCCTT<br>TCATAGAACCTCG      | TGCAGGTCGACAT <b>CGAT</b> CTAATAAAG<br>CACCTTCGCTAACAT    |
| <b>MRB8620</b>  | CGC <b>GAATTC</b> ATGAGTAACCCTTTTGA<br>GAAAGTTGC          | CGC <b>GGATCC</b> CTACTTACCACCATCTT<br>GCGACAAC           |
| <b>MRB8170</b>  | TGTATCGCCG <b>GAATTC</b> ATGCGACGG<br>CTAAGCCTTCTT        | TGCAGGTCGACAT <b>CGAT</b> CTAACAAAA<br>TACCTTCGCTAACAT    |
| <b>TbRGG2</b>   | AAAAGAGATC <b>GAATTC</b> ATGAAGCGCA<br>CACCTGTT           | TGCAGGTCGACAT <b>CGAT</b> CACCTTCTG<br>ACTGGCATC          |
| <b>TbRGG1</b>   | AAAAGAGATC <b>GAATTC</b> ATGGTGTGTA<br>GCACCATC           | TGCAGGTCGACAT <b>CGAT</b> CTTTCCAC<br>CAAACCTAGG          |
| <b>MRB1860</b>  | GCG <b>CATATG</b> CTGCTGCCACTCTCG<br>AGCG                 | GCG <b>GATCTATCGATT</b> CACACCAGCT<br>GTAAAGGCGGATTATTCAC |
| <b>MRB6070</b>  | TGTATCGCCG <b>GAATTC</b> GATGTAAACC<br>TAAAGTTGTGTGG      | TGCAGGTCGACAT <b>CGAT</b> CTAAGAATC<br>TGATTCTTTAGAGGCTC  |
| <b>MRB6070</b>  | CGC <b>GAATTC</b> ATGTTCAAGCGGGCTTCA<br>GCGTGC            | CGC <b>GGATCC</b> TAAGAATCTGATTCTTT<br>AGAGGCTC           |
| <b>MRB800</b>   | TGTATCGCCG <b>GAATTC</b> ATGCGACGTC<br>GGGTAGTTTTATG      | TGCAGGTCGACAT <b>CGAT</b> CTAAAGCGA<br>TGCTTCGTCAGGT      |
| <b>MRB10130</b> | GCG <b>CATATG</b> CTCAACGTTCTCTCGAG<br>CACAGC             | CGC <b>GTGACT</b> CACATAACTCCGGGAG<br>CAGCTCC             |
| <b>MRB8180</b>  | GGAGGCCAGT <b>GAATTC</b> ATGTACCGT<br>CTTTATCGTCCGACTGTAG | CGAGCTCGAT <b>GGATCC</b> CTAAACTGCT<br>GTGGCCAG           |
| <b>MRB1680</b>  | AAAAGAGATC <b>GAATTC</b> ATGTGTACAC<br>ACGCGCTCATATC      | TGCAGGTCGACAT <b>CGAT</b> TTACGACGT<br>CACCTCACTTACCT     |
| <b>MRB1590</b>  | CATGGAGGCC <b>GAATTC</b> ATGTACCATC<br>GTGGCTACGGC        | GCAGGTCGAC <b>GGATCC</b> TCATCTTTTC<br>GCAGTAACGGTCC      |
| <b>MRB0880</b>  | CGC <b>GAATTC</b> ATGAGGAGTAGCCGGG<br>GTATTTTG            | CGC <b>GGATCC</b> TACTGTGTACCGTGTT<br>CACCCGC             |

**PTP construct primers**

|                 |                            |                            |
|-----------------|----------------------------|----------------------------|
| <b>MRB6070</b>  | GAGGGCCCGTTCCAGTAGGGGTGGA  | GAGCGGCCGCGAATCTGATTCTTTAG |
| <b>MRB5390</b>  | GAGGGCCCTGAACGACCAACTGTAC  | GAGCGGCCCGCGTCTCAATAGAAGC  |
| <b>MRB10130</b> | GGAAGCTTCATCCGATCACCTCATGA | GAGCGGCCGCTAACTCCGGGAGCA   |
| <b>MRB11870</b> | GAGGGCCCATAGCAGTTGGCCACG   | GAGCGGCCGCTTCTGCAGTTGATGC  |

**RG2 3'UTR RNAi construct primers**

|               |                            |                           |
|---------------|----------------------------|---------------------------|
| <b>TbRGG2</b> | GAGGATCCAACCCTATTTACGGGAAT | GACTCGAGCCCAAAGACAATACGGT |
|---------------|----------------------------|---------------------------|

**TbRGG2 addback construct primers**

|               |                            |                           |
|---------------|----------------------------|---------------------------|
| <b>TbRGG2</b> | GGAAGCTTATGAAGCGCACACCTGTT | GTCTAGACACCTTCTGACTGGCATC |
|---------------|----------------------------|---------------------------|

**Supplementary Table S2. Likely contaminants associated with MRB1 components identified by LC-MS/MS.**

| <u>MRB10130 likely contaminants</u>                             | <u>Unique peptides</u> | <u>Amino acid coverage</u> | <u>Description</u>                               |
|-----------------------------------------------------------------|------------------------|----------------------------|--------------------------------------------------|
| Tb09.211.4511,<br>Tb09.211.4512,<br>Tb09.211.4513               | 2                      | 27.20%                     | Kinetoplastid membrane protein 11 (KMP-11)       |
| Tb927.1.2340,<br>Tb927.1.2360,<br>Tb927.1.2380,<br>Tb927.1.2400 | 8                      | 23.70%                     | Tubulin alpha chain                              |
| Tb927.3.4360,<br>Tb11.02.4000                                   | 2                      | 22.20%                     | 40S ribosomal protein S15a, putative             |
| Tb927.1.2330,<br>Tb927.1.2350,<br>Tb927.1.2370,<br>Tb927.1.2390 | 5                      | 20.10%                     | Tubulin beta chain (Beta tubulin)                |
| Tb10.70.5650,<br>Tb10.70.5670                                   | 7                      | 19.20%                     | translation elongation factor eEF-1 alpha chain  |
| Tb10.26.0370,<br>Tb09.160.4450                                  | 2                      | 12.60%                     | RPS3  40S ribosomal protein S3, putative         |
| Tb09.160.4200                                                   | 1                      | 10.60%                     | 28G16.390 60S acidic ribosomal protein, putative |
| Tb927.4.1800,<br>Tb927.4.1790                                   | 2                      | 8.90%                      | ribosomal protein L3, mitochondrial, putative    |
| Tb11.0880,<br>Tb11.50.0005,<br>Tb927.4.1100                     | 1                      | 8.80%                      | 60S ribosomal protein L21E, putative             |
| Tb10.70.4740                                                    | 2                      | 8.60%                      | enolase                                          |
| Tb09.211.3270,<br>Tb09.211.3280                                 | 1                      | 8.00%                      | 60S ribosomal subunit protein L31, putative      |
| Tb10.70.3510,<br>Tb11.01.5720                                   | 1                      | 7.80%                      | 60S ribosomal protein L18a, putative             |
| Tb10.6k15.0410,<br>Tb11.02.1840                                 | 1                      | 7.80%                      | 60S ribosomal protein L18                        |
| Tb10.05.0220,<br>Tb11.01.1470                                   | 1                      | 7.00%                      | 60S ribosomal protein L10a                       |
| Tb09.211.0110,<br>Tb09.211.0340                                 | 1                      | 6.60%                      | 60S ribosomal protein L10, putative              |
| Tb10.26.1080                                                    | 3                      | 6.20%                      | heat shock protein 83                            |
| Tb10.61.1810,<br>Tb10.61.1820,<br>Tb10.61.1830                  | 1                      | 5.90%                      | mitochondrial carrier protein, putative          |
| Tb10.70.5110                                                    | 1                      | 5.00%                      | mMDH mitochondrial malate dehydrogenase          |

|                                               |   |       |                                                           |
|-----------------------------------------------|---|-------|-----------------------------------------------------------|
| Tb11.01.3170,<br>Tb11.01.3180                 | 2 | 4.40% | Guanine nucleotide-binding protein subunit b-like protein |
| Tb09.244.2730,<br>Tb09.244.2740               | 1 | 3.20% | 60S ribosomal protein L5, putative                        |
| Tb927.3.5050                                  | 1 | 3.20% | 60S ribosomal protein L4                                  |
| Tb927.2.1080,<br>Tb927.2.240,<br>Tb11.02.2380 | 1 | 1.30% | retrotransposon hot spot (RHS) protein, putative          |

| <b><u>MRB5390 likely contaminants</u></b>                       | <b><u>Unique peptides</u></b> | <b><u>Amino acid coverage</u></b> | <b><u>Description</u></b>                       |
|-----------------------------------------------------------------|-------------------------------|-----------------------------------|-------------------------------------------------|
| Tb927.1.2330,<br>Tb927.1.2350,<br>Tb927.1.2370,<br>Tb927.1.2390 | 10                            | 28.10%                            | Tubulin beta chain (Beta tubulin)               |
| Tb10.70.5650,<br>Tb10.70.5670                                   | 10                            | 27.80%                            | translation elongation factor eEF-1 alpha chain |
| Tb927.1.2340,<br>Tb927.1.2360,<br>Tb927.1.2380,<br>Tb927.1.2400 | 8                             | 22.80%                            | Tubulin alpha chain                             |
| Tb10.389.0690                                                   | 3                             | 8.20%                             | mitochondrial carrier protein, putative         |
| Tb927.6.4280,<br>Tb927.6.4300                                   | 3                             | 8.20%                             | GAPDH glyceraldehyde 3-phosphate dehydrogenase  |
| Tb10.389.1500                                                   | 1                             | 7.00%                             | short-chain dehydrogenase, putative             |
| Tb10.70.5110                                                    | 1                             | 5.00%                             | mMDH mitochondrial malate dehydrogenase         |

| <b><u>MRB6070 likely contaminants</u></b>                       | <b><u>Unique peptides</u></b> | <b><u>Amino acid coverage</u></b> | <b><u>Description</u></b>                       |
|-----------------------------------------------------------------|-------------------------------|-----------------------------------|-------------------------------------------------|
| Tb09.211.4540                                                   | 4                             | 17.00%                            | DRBD2                                           |
| Tb09.211.2150                                                   | 4                             | 9.20%                             | poly(A)-binding protein 1                       |
| Tb927.1.2340,<br>Tb927.1.2360,<br>Tb927.1.2380,<br>Tb927.1.2400 | 2                             | 5.50%                             | Tubulin alpha chain                             |
| Tb11.24.0006                                                    | 1                             | 2.80%                             | expression site-associated gene, putative       |
| Tb10.70.5680,<br>Tb10.70.5650,<br>Tb10.70.5670                  | 1                             | 2.30%                             | TEF1 elongation factor 1-alpha                  |
| Tb10.70.0280,<br>Tb10.70.0430                                   | 1                             | 2.10%                             | HSP60 chaperonin Hsp60, mitochondrial precursor |
| Tb927.1.880                                                     | 1                             | 0.10%                             | putative uncharacterized protein                |

| <b><u>MRB11870 likely containants</u></b>                       | <b><u>Unique peptides</u></b> | <b><u>Amino Acid coverage</u></b> | <b><u>Description</u></b>         |
|-----------------------------------------------------------------|-------------------------------|-----------------------------------|-----------------------------------|
| Tb927.1.2340,<br>Tb927.1.2360,<br>Tb927.1.2380,<br>Tb927.1.2400 | 2                             | 5.30%                             | Tubulin alpha chain               |
| Tb927.1.2330,<br>Tb927.1.2350,<br>Tb927.1.2370,                 | 1                             | 2.70%                             | Tubulin beta chain (Beta tubulin) |
| Tb10.70.5680,<br>Tb10.70.5650,<br>Tb10.70.5670                  | 1                             | 2.30%                             | TEF1 elongation factor 1-alpha    |
| Tb09.211.0940                                                   | 1                             | 2.90%                             | hypothetical protein, conserved   |
